# Supplementary material
Source: MDPI journal article supplement (https://www.mdpi.com/2073-4395/11/8/1646)
Supplement: s1 [file s1]

# Genome-Wide Association Mapping for Stomata and Yield Indices in Bread Wheat under Water Shortage Conditions

**Table S1: Genotypes code, name and pedigree of 96 bread wheat genotypes**

| Code | Name    | Pedigree                                                       |  |
|------|---------|----------------------------------------------------------------|--|
| G1   | 9493    | LU26'S'/Pb96                                                   |  |
| G2   | 9496    | 5039/Rawal87                                                   |  |
| G3   | 9508    | 5039/Pb96                                                      |  |
| G4   | 9515    | 4770/Pb76                                                      |  |
| G5   | 9596    | Rawal87/Pb76                                                   |  |
| G6   | 9610    | Pasban90/4943                                                  |  |
| G7   | 9618    | Pb96/Pasban90                                                  |  |
| G8   | 9675    | Pb76/Pb96                                                      |  |
| G9   | 9707    | 8060/Rawal87                                                   |  |
| G10  | 9736    | Inq91/30th SAWSN 30 (1998-99)                                  |  |
| G11  | 9796    | LU26'S'/PBW222                                                 |  |
| G12  | 9797    | Inq91/PBW222                                                   |  |
| G13  | 9869    | Parwaz94/Inq91                                                 |  |
| G14  | 9870    | 9515/Parwaz94                                                  |  |
| G15  | 9877    | 9244/PBW222                                                    |  |
| G16  | 9883    | 9244/Iqbal2000                                                 |  |
| G17  | 9930    | 4492/Parwaz94                                                  |  |
| G18  | 9970    | DN49/ Seher06                                                  |  |
| G19  | 9889    | 9244/Parwaz94                                                  |  |
| G20  | 9970    | DN49/Seher06                                                   |  |
| G21  | 9244    | N/A                                                            |  |
| G22  | 9764    | WLRG 3 1-8 (1993-94)/5039                                      |  |
| G23  | BWL-812 | C 591/RN//JN/3/CHR/HD 1941                                     |  |
| G24  | PBW-175 | HD2160/4/JN/GAGE//JN/KALYANSONA/3/V-18/C-273; HD-2160/WG-1025; |  |
| G25  | Anza    | LERMA-ROJO-64//NORIN-10/BREVOR/3/3*ANDES-ENANO                 |  |

PBG-UAF G1-G22 (Total 22 genotypes)

than Pakistan)  
G23-G46 (Total 24 genotypes)

|     |            |                                                                |
|-----|------------|----------------------------------------------------------------|
| G26 | PBW 222    | NP 890 /HD 2160                                                |
| G27 | HD 2307    | HD-2160/116-1-3                                                |
| G28 | DPW-621-50 | KAUZ//ALTAR-84/(AOS)AWNED-ONAS/3/MILAN/KAUZ/4/HUITES           |
| G29 | PBW 343    | Attila                                                         |
| G30 | HD 2967    | ALD/COC//URES/HD2160M/HD2278                                   |
| G31 | BWL-1793   | ND/VG9144 //KAL/BB/3/YCO'S/4/VEE#5 'S'                         |
| G32 | BWL-9022   | N/A                                                            |
| G33 | BWL-0924   | N/A                                                            |
| G34 | BWL-1771   | N/A                                                            |
| G35 | C-10115    | N/A                                                            |
| G36 | BWL-0814   | N/A                                                            |
| G37 | Sonara-64  | N/A                                                            |
| G38 | PBN-51     | N/A                                                            |
| G39 | C-586642   | N/A                                                            |
| G40 | Sakha      | INIA-66(S)/NAPO-63                                             |
| G41 | PBW 621    | KAUZ//ALTAR-84/(AOS)AWNED-ONAS/3/MILAN/KAUZ/4/HUITES           |
| G42 | C-10117    | N/A                                                            |
| G43 | Bareukee   | N/A                                                            |
| G44 | Redfiled   | N/A                                                            |
| G45 | Gutha      | GAMENYA//GABO*3/KHAPSTEIN(M-146)/3/FALCON*3/CHILE.             |
| G46 | Sunstar    | CONDOR,AUS/4/2*WW-15/3/STEINWEDEL/YAROSLAV-EMMER//LA-PREVISION |
| G47 | Watan      | LU26/HD 2179                                                   |
| G48 | AARI-2011  | SH-88/90A-204//MH97                                            |
| G49 | Aas-2011   | PRL/PASTOR//2236                                               |
| G50 | Abadgar-93 | PSN/BOW                                                        |
| G51 | Anmol-91   | KVZ/TRM//PTM/ANA                                               |
| G52 | Chakwal-86 | FORLANI/ACC//ANA or Fln/ACS//ANA                               |
| G53 | Uqab-2000  | CROW'S/NAC//BOW'S'                                             |
| G54 | Bahawal-97 | PFAU'S/SERI                                                    |
| G55 | Bwp-2000   | AU/UP301//GLL/Sx/3/PEW S/4/MAI S/MAY A S//PEWS                 |

Historical Pakistani cultivated varieties G47-G96  
(Total 50 genotypes)

|     |                 |                                                                                   |
|-----|-----------------|-----------------------------------------------------------------------------------|
| G56 | Bakhtawar-94    | Mentana/Mayo//4-11                                                                |
| G57 | Bakhar-2002     | P102/PIMA//F371/TTR/BOW/3/PVN                                                     |
| G58 | Bakhtawar-93    | AU/UP301//GLL/SX/3/PEW/4/MAI/MAYA//PEW                                            |
| G59 | Pasban-90       | INIA F66/TH.DISTICHUM//INIAF66/3/GENARO T81 or INIA F66/A.DISTICHUM//INIA66/3/GEN |
| G60 | Bathoor-2008    | URES/JUN//KAUZ                                                                    |
| G61 | Chakwal-50      | ATTILA/3/HUI/CARC//CHEN/CHTO/4/ATTILA                                             |
| G62 | AS-2002         | KHP/D31708//CMH74A370/3/ENO79/4/R26043/*4NAC                                      |
| G63 | Chakwal-97      | BUC'S'/FCT'S'                                                                     |
| G64 | Shafaq-2006     | LU 26/HD 2179/ 2*INQALAB 91                                                       |
| G65 | Fakhar-e-Sarhad | NORD-DESPREZ(ND)/VG-9144//KALYANSONA/BLUEBIRD/3/YACO/4/VEERY-5                    |
| G66 | Fareed-2006     | PT'S'/3/TOB/LFN//BB/4/BB/HD-832-5//ON/5/G-V/ALD'S'//HPO                           |
| G67 | FSD-2008        | PBW65/2*Pastor                                                                    |
| G68 | Millat-2011     | CHENAB2000/INQ-91                                                                 |
| G69 | FSD-85          | MAYA/MON//KVZ/TRM                                                                 |
| G70 | GA 2002         | DWL5023/SNB//SNB                                                                  |
| G71 | Galaxy-2013     | Pb96/Watan/MH-97                                                                  |
| G72 | Gomal-2008      | Attila                                                                            |
| G73 | Hashim-2008     | JUP/ALD'S'//KLT'S'/3/VEE'S'/6/BEZ//TOB/8156/4/ON/3/6*TH/KF//6*LEE/KF/-----        |
| G74 | Inq-91          | WL 711/CROW "S"                                                                   |
| G75 | Iqbal-2000      | BURGUS/SORT 12-13//KAL/BB/3/PAK 81                                                |
| G76 | Kaghan-93       | TTR/JUN                                                                           |
| G77 | Khyber-87       | KVZ/TRM//PTM/ANA                                                                  |
| G78 | Kohistan-97     | V-1562//CHRC'S'/HORK/3/KUFRA-I/4/CARP'S'/BJY'S'                                   |
| G79 | Kohinoor-83     | ORE F1 158/FDL//MFN/2*TIBA63/3/COC                                                |
| G80 | Kohsar-95       | PSN/BOW                                                                           |
| G81 | Lasani-2008     | LUAN/KOH-97                                                                       |
| G82 | Ufaq-2002       | V.84133/V83150                                                                    |
| G83 | Marvi-2000      | CMH-77A917/PKV 1600//RL6010/6*SKA                                                 |
| G84 | Maxi-Pak 65     | PJ/GB55                                                                           |

|     |                     |                                   |
|-----|---------------------|-----------------------------------|
| G85 | Mehran-89           | KVZ/BUHO//KAL/BB                  |
| G86 | MH-97               | Attila                            |
| G87 | FSD-83              | FURY//KAL/BB                      |
| G88 | Mairaj-08           | SPARROW/INIA//V.7394/WL711/3/BAUS |
| G89 | Moomal-2002         | BUC or BUCS/4/TZPP/IRN46          |
| G90 | Margalla-99         | OPATA/BOW'S'                      |
| G91 | NARC-2009           | INQALAB 91*2/TUKURU               |
| G92 | Nifa-barsat<br>2010 | FRET2                             |
| G93 | Nowshera-96         | BUC/FLK//MYNA/VUL                 |
| G94 | Pak-81              | VEERY.                            |
| G95 | Parwaz-94           | V.5648/PARULA or V.5648/PRL       |
| G96 | BARS-2009           | PFAU/SERI//BOW                    |

PBG-UAF (origin) = Department Plant Breeding and Genetics, University of Agriculture, Faisalabad Pakistan G1-G22 (Total 22 genotypes)

Exotic (origin) = Foreign (other than Pakistan) G23-G46 (Total 24 genotypes)

Indigenous (origin) = Historical Pakistani cultivated varieties (other than PBG-UAF), G47-G96 (Total 50 genotypes)

**Table S2.** GWAS Results under normal conditions.

|     | SNP                     | Chromosome | Position | P.value  | FDR      | R%    |
|-----|-------------------------|------------|----------|----------|----------|-------|
| FLA | RAC875_s117925_244      | 5A         | 77.77    | 2.53E-05 | 0.046089 | 25.66 |
|     | RAC875_c16333_340       | 2A         | 427.05   | 7.99E-05 | 0.046089 | 24.70 |
|     | BS00110877_51           | 1A         | 333.28   | 0.000305 | 0.04667  | 23.88 |
|     | BS00084880_51           | 2D         | 222.41   | 0.000306 | 0.028842 | 22.97 |
|     | BobWhite_rep_c66990_294 | 3B         | 320.47   | 0.000348 | 0.029133 | 22.08 |
|     | RAC875_c33823_279       | 3D         | 245.89   | 0.000475 | 0.024017 | 21.19 |
|     | Excalibur_c34115_271    | 7A         | 103.7    | 0.000481 | 0.018901 | 20.30 |
|     | BS00037976_51           | 1A         | 337.41   | 0.000537 | 0.013785 | 19.41 |
|     | Excalibur_c65152_572    | 1B         | 344.72   | 0.000598 | 0.00867  | 18.52 |
|     | BobWhite_c15453_678     | 2D         | 208.94   | 0.000659 | 0.003554 | 17.63 |
|     | Excalibur_c8998_469     | 3B         | 320.47   | 0.000691 | 0.003554 | 16.74 |
|     | GENE-1934_501           | 3A         | 564.57   | 0.000737 | 0.003554 | 15.85 |
|     | BS00031266_51           | 2D         | 222.41   | 0.00075  | 0.003554 | 14.96 |
|     | Excalibur_c33683_104    | 2D         | 216.17   | 0.00077  | 0.003554 | 14.07 |
|     | RAC875_c701_88          | 7A         | 123.58   | 0.000898 | 0.003554 | 13.18 |
|     | wsnp_JD_c1549_2185341   | 4B         | 186.85   | 0.000905 | 0.003554 | 12.29 |
|     | BS00100539_51           | 2D         | 216.02   | 0.000938 | 0.003554 | 11.40 |
|     | wsnp_BE591290B_Ta_2_7   | 1A         | 411.61   | 0.000945 | 0.003554 | 10.51 |
|     | RFL_Contig5204_503      | 2D         | 213.63   | 0.000976 | 0.003554 | 9.62  |
| SS  | wsnp_Ex_c24167_33416760 | 7A         | 148.26   | 0.000121 | 0.028842 | 29.65 |
|     | IAAV4269                | 5B         | 126.02   | 0.000133 | 0.028842 | 28.80 |
|     | BS00038787_51           | 7A         | 369.49   | 0.000137 | 0.042546 | 28.10 |
|     | BobWhite_c23828_341     | 6B         | 150.07   | 0.000169 | 0.042546 | 27.90 |
|     | Tdurum_contig10598_304  | 6B         | 229.64   | 0.000215 | 0.042546 | 27.13 |
|     | BS00064602_51           | 1B         | 246.08   | 0.000268 | 0.042546 | 26.53 |
|     | Kukri_c22011_1447       | 1A         | 481.08   | 0.000303 | 0.042546 | 25.94 |
|     | Ra_c58279_684           | 2A         | 261.05   | 0.000325 | 0.042546 | 25.34 |
|     | Excalibur_s113695_111   | 6B         | 237.57   | 0.00033  | 0.042546 | 24.75 |
|     | RAC875_c14078_202       | 5B         | 620.71   | 0.000332 | 0.042546 | 24.15 |
|     | wsnp_Ku_c792_1635317    | 7A         | 123.58   | 0.000362 | 0.042546 | 23.56 |
|     | Excalibur_c35339_106    | 2A         | 220.48   | 0.000393 | 0.042546 | 22.96 |
|     | wsnp_Ex_c5412_9564046   | 2A         | 261.05   | 0.000475 | 0.018715 | 22.37 |
|     | BS00009791_51           | 2B         | 431.19   | 0.000484 | 0.042546 | 21.77 |
|     | Ra_c33766_656           | 3B         | 553.79   | 0.000519 | 0.042546 | 21.18 |
|     | wsnp_Ex_c8913_14881924  | 4B         | 173.63   | 0.000549 | 0.042546 | 20.58 |
|     | BobWhite_c44691_648     | 4B         | 173.63   | 0.000549 | 0.042546 | 19.99 |
|     | Tdurum_contig81797_369  | 4B         | 173.63   | 0.000549 | 0.042546 | 19.39 |
|     | BS00023431_51           | 4B         | 173.63   | 0.000549 | 0.042546 | 18.80 |
|     | Kukri_c27495_816        | 1B         | 206.01   | 0.000554 | 0.042546 | 18.20 |

|    |                             |    |        |          |          |       |
|----|-----------------------------|----|--------|----------|----------|-------|
|    | BS00076298_51               | 3D | 1      | 0.000618 | 0.042546 | 17.61 |
|    | Kukri_c55051_414            | 5A | 68.2   | 0.000619 | 0.042546 | 17.01 |
|    | RAC875_rep_c104914_222      | 5B | 119.59 | 0.000723 | 0.042546 | 16.42 |
|    | BS00062122_51               | 1B | 105.75 | 0.000857 | 0.042546 | 15.82 |
|    | Kukri_c28230_267            | 7A | 371.96 | 0.000874 | 0.042546 | 15.23 |
|    | Excalibur_c76695_71         | 3B | 578.89 | 0.000885 | 0.042546 | 14.63 |
|    | RAC875_c701_88              | 7A | 123.58 | 0.000908 | 0.042546 | 14.04 |
|    | RAC875_c50245_765           | 2D | 133.17 | 0.00094  | 0.018715 | 13.44 |
|    | Kukri_c28284_1132           | 6B | 401.83 | 0.000956 | 0.042546 | 12.85 |
|    | BS00065784_51               | 1A | 291.13 | 0.000977 | 0.042546 | 12.25 |
| SF | wsnp_RFL_Contig2699_2402527 | 3A | 321.73 | 3.87E-05 | 0.018715 | 29.30 |
|    | RAC875_c48445_317           | 7A | 98.21  | 0.000115 | 0.020394 | 28.00 |
|    | Excalibur_rep_c71254_415    | 5A | 423.48 | 0.000413 | 0.020394 | 27.00 |
|    | Excalibur_c5958_1398        | 1D | 117.57 | 0.000425 | 0.020394 | 25.80 |
|    | Kukri_c55362_75             | 6D | 41.68  | 0.00046  | 0.020394 | 24.65 |
|    | RAC875_c16333_340           | 2A | 427.05 | 0.000465 | 0.020394 | 23.50 |
|    | Kukri_c4834_1883            | 6B | 245.09 | 0.000556 | 0.020394 | 22.35 |
|    | Excalibur_c102781_70        | 7B | 451.1  | 0.000584 | 0.020394 | 21.20 |
|    | Tdurum_contig30546_176      | 5A | 506.47 | 0.000596 | 0.020394 | 20.05 |
|    | wsnp_JD_c16245_15468917     | 3B | 323    | 0.000631 | 0.015273 | 18.90 |
|    | BS00030251_51               | 1B | 250.98 | 0.000689 | 0.020394 | 17.75 |
|    | Ex_c14725_242               | 3B | 323    | 0.000756 | 0.020394 | 16.60 |
|    | BS00010134_51               | 7B | 458.56 | 0.000766 | 0.020394 | 15.45 |
|    | BS00102641_51               | 3B | 323.92 | 0.000778 | 0.020394 | 14.30 |
|    | RAC875_c403_2247            | 3B | 337.91 | 0.000861 | 0.020394 | 13.15 |
|    | BS00094471_51               | 1D | 117.57 | 0.000915 | 0.020394 | 12.00 |
|    | Kukri_c49506_396            | 4B | 117.43 | 0.000921 | 0.020394 | 10.85 |
|    | wsnp_Ku_c14875_23320708     | 3B | 323.92 | 0.000923 | 0.015273 | 9.70  |
|    | Excalibur_c8998_469         | 3B | 320.47 | 0.000973 | 0.020394 | 8.55  |
| LV | wsnp_Ra_c3176_5975986       | 7B | 246.93 | 3.50E-05 | 0.011287 | 29.50 |
|    | GENE-4367_562               | 4A | 575.49 | 4.51E-05 | 0.011287 | 29.00 |
|    | BS00038787_51               | 7A | 369.49 | 6.63E-05 | 0.011287 | 28.40 |
|    | IAAV8743                    | 1A | 311.34 | 0.00016  | 0.011287 | 28.10 |
|    | Excalibur_c17237_688        | 2D | 222.41 | 0.000174 | 0.011287 | 27.55 |
|    | RAC875_c38307_91            | 2B | 80.52  | 0.000197 | 0.011287 | 27.07 |
|    | Excalibur_c35339_106        | 4B | 220.48 | 0.000239 | 0.022508 | 26.59 |
|    | BobWhite_c23828_341         | 6B | 150.07 | 0.000261 | 0.022508 | 26.11 |
|    | Excalibur_c26971_1730       | 4A | 598.31 | 0.000271 | 0.026592 | 25.63 |
|    | Excalibur_c24613_302        | 6B | 408.89 | 0.000289 | 0.00671  | 25.15 |
|    | Kukri_c55051_414            | 5A | 68.2   | 0.000334 | 0.00671  | 24.67 |
|    | RFL_Contig2531_2144         | 4A | 567.81 | 0.000369 | 0.00671  | 24.19 |

|     |                         |    |        |          |          |       |
|-----|-------------------------|----|--------|----------|----------|-------|
|     | BobWhite_c41815_145     | 7A | 371.18 | 0.000377 | 0.00671  | 23.71 |
|     | RAC875_c38193_187       | 7B | 228.36 | 0.000379 | 0.00671  | 23.23 |
|     | IAAV4269                | 5B | 126.02 | 0.000384 | 0.00671  | 22.75 |
|     | Ra_c4568_960            | 6A | 338.95 | 0.000447 | 0.019639 | 22.27 |
|     | BS00067940_51           | 3A | 433.76 | 0.000509 | 0.020868 | 21.79 |
|     | Tdurum_contig94033_487  | 5B | 401.49 | 0.000538 | 0.020868 | 21.31 |
|     | Tdurum_contig11399_221  | 5B | 401.49 | 0.000538 | 0.023877 | 20.83 |
|     | Excalibur_s113695_111   | 6B | 237.57 | 0.000555 | 0.023877 | 20.35 |
|     | wsnp_Ex_c24167_33416760 | 7A | 148.26 | 0.000572 | 0.023877 | 19.87 |
|     | Ku_c17871_1360          | 1B | 287.03 | 0.000619 | 0.023877 | 19.39 |
|     | RFL_Contig2815_1764     | 6A | 11.39  | 0.000627 | 0.023877 | 18.91 |
|     | Ra_c33766_656           | 3B | 553.79 | 0.00063  | 0.023877 | 18.43 |
|     | Tdurum_contig46583_2203 | 4A | 575.49 | 0.000667 | 0.023877 | 17.95 |
|     | Kukri_c4709_53          | 4A | 598.31 | 0.00079  | 0.023877 | 17.47 |
|     | wsnp_Ex_c11120_18022932 | 5A | 445.69 | 0.000791 | 0.023877 | 16.99 |
|     | Excalibur_c50999_269    | 4A | 575.49 | 0.000853 | 0.023877 | 16.51 |
|     | Excalibur_c16798_281    | 2B | 291.73 | 0.000876 | 0.023877 | 16.03 |
|     | Tdurum_contig42590_755  | 7A | 103.7  | 0.000961 | 0.023877 | 15.55 |
|     | BS00109911_51           | 4A | 603.44 | 0.000968 | 0.023877 | 15.07 |
|     | Kukri_c2101_1551        | 4A | 575.49 | 0.000999 | 0.023877 | 14.59 |
| NGS | Ra_c58279_684           | 2A | 261.05 | 1.55E-05 | 0.011287 | 21.50 |
|     | wsnp_Ex_c5412_9564046   | 2A | 261.05 | 1.58E-05 | 0.011287 | 21.10 |
|     | GENE-4367_562           | 4A | 575.49 | 2.64E-05 | 0.011287 | 20.50 |
|     | BS00038787_51           | 7A | 369.49 | 8.16E-05 | 0.011287 | 20.03 |
|     | BS00109911_51           | 4A | 603.44 | 0.000112 | 0.011287 | 19.53 |
|     | wsnp_Ra_c3176_5975986   | 7B | 246.93 | 0.000119 | 0.011287 | 19.03 |
|     | wsnp_Ex_c5412_9564550   | 2A | 261.05 | 0.000186 | 0.011287 | 18.53 |
|     | wsnp_Ex_c5412_9564346   | 2A | 257.26 | 0.00019  | 0.011287 | 18.03 |
|     | wsnp_Ex_c5412_9564478   | 2A | 257.26 | 0.000208 | 0.011287 | 17.53 |
|     | Excalibur_c26971_1730   | 4A | 598.31 | 0.000218 | 0.011287 | 17.03 |
|     | Tdurum_contig46583_2203 | 4A | 575.49 | 0.000262 | 0.011287 | 16.53 |
|     | tplb0025h02_1383        | 6D | 293.15 | 0.000309 | 0.011287 | 16.03 |
|     | wsnp_Ku_c10292_17066821 | 1A | 261.32 | 0.00031  | 0.011287 | 15.53 |
|     | wsnp_Ex_c8913_14881924  | 4B | 173.63 | 0.000331 | 0.011287 | 15.03 |
|     | BobWhite_c44691_648     | 4B | 173.63 | 0.000331 | 0.011287 | 14.53 |
|     | Tdurum_contig81797_369  | 4B | 173.63 | 0.000331 | 0.011287 | 14.03 |
|     | BS00023431_51           | 4B | 173.63 | 0.000331 | 0.011287 | 13.53 |
|     | BobWhite_c26570_282     | 2A | 410.9  | 0.000332 | 0.011287 | 13.03 |
|     | Kukri_c4709_53          | 4A | 598.31 | 0.00037  | 0.011287 | 12.53 |
|     | BS00026471_51           | 3B | 23.14  | 0.000397 | 0.011287 | 12.03 |
|     | wsnp_Ku_c792_1635317    | 7A | 123.58 | 0.00042  | 0.011287 | 11.53 |

|     |                             |    |        |          |          |       |
|-----|-----------------------------|----|--------|----------|----------|-------|
|     | D_GDEEGVY01EG2MJ_349        | 6D | 50.3   | 0.000454 | 0.011287 | 11.03 |
|     | Excalibur_c50999_269        | 4A | 575.49 | 0.000495 | 0.011287 | 10.53 |
|     | Excalibur_c24613_302        | 6B | 408.89 | 0.000502 | 0.011287 | 10.03 |
|     | BobWhite_c41815_145         | 7A | 371.18 | 0.000588 | 0.011287 | 9.53  |
|     | Excalibur_c34115_271        | 7A | 103.7  | 0.000613 | 0.011287 | 9.03  |
|     | Kukri_c2101_1551            | 4A | 575.49 | 0.000618 | 0.022508 | 8.53  |
|     | BobWhite_c27352_145         | 3B | 121.32 | 0.000651 | 0.022508 | 8.03  |
|     | CAP8_c6370_254              | 6B | 245.09 | 0.000684 | 0.026592 | 7.53  |
|     | wsnp_Ex_c24167_33416760     | 7A | 148.26 | 0.000726 | 0.00671  | 7.03  |
|     | Tdurum_contig62155_325      | 6B | 245.09 | 0.000728 | 0.00671  | 6.53  |
|     | Jagger_c342_119             | 3B | 42.1   | 0.000758 | 0.00671  | 6.53  |
|     | BS00067430_51               | 4A | 603.44 | 0.000759 | 0.00671  | 6.53  |
|     | RAC875_s117925_244          | 5A | 77.77  | 0.000759 | 0.00671  | 6.53  |
|     | wsnp_Ex_c3854_7003482       | 6B | 245.09 | 0.000793 | 0.00671  | 6.53  |
|     | BS00010134_51               | 7B | 458.56 | 0.000806 | 0.019639 | 6.53  |
|     | D_GA8KES402GRIFZ_148        | 2A | 213.37 | 0.000819 | 0.020868 | 6.53  |
|     | wsnp_Ex_rep_c66315_64480670 | 6B | 245.09 | 0.000854 | 0.020868 | 6.53  |
|     | TA006249-0396               | 6B | 245.09 | 0.000886 | 0.023877 | 6.53  |
|     | wsnp_Ex_c24766_34017588     | 6B | 245.09 | 0.000886 | 0.026886 | 6.53  |
|     | wsnp_Ex_rep_c66315_64480362 | 6B | 245.09 | 0.000886 | 0.029895 | 6.53  |
|     | wsnp_Ra_c35443_43984178     | 6B | 245.09 | 0.000886 | 0.032904 | 6.53  |
|     | Excalibur_c98849_278        | 6B | 245.09 | 0.000908 | 0.035914 | 6.53  |
|     | RFL_Contig1015_580          | 6B | 245.8  | 0.000908 | 0.038923 | 6.53  |
|     | Tdurum_contig81414_256      | 6B | 246.18 | 0.000908 | 0.041932 | 6.53  |
|     | wsnp_Ku_c15761_24469459     | 6B | 245.09 | 0.000914 | 0.044941 | 6.53  |
|     | Excalibur_c53680_124        | 6D | 50.3   | 0.000978 | 0.04795  | 6.53  |
| GYP | BS00038787_51               | 7A | 369.49 | 8.10E-05 | 0.011287 | 23.50 |
|     | wsnp_Ex_c24167_33416760     | 7A | 148.26 | 9.49E-05 | 0.011287 | 23.40 |
|     | IAAV4269                    | 5B | 126.02 | 0.000181 | 0.011287 | 23.10 |
|     | Tdurum_contig10598_304      | 6B | 229.64 | 0.000214 | 0.011287 | 22.60 |
|     | Ra_c58279_684               | 2A | 261.05 | 0.000229 | 0.022508 | 22.40 |
|     | BobWhite_c23828_341         | 6B | 150.07 | 0.000256 | 0.033729 | 22.10 |
|     | Kukri_c22011_1447           | 1A | 481.08 | 0.000281 | 0.044949 | 21.80 |
|     | wsnp_Ex_c5412_9564046       | 2A | 261.05 | 0.000309 | 0.05617  | 21.50 |
|     | Excalibur_c35339_106        | 4B | 220.48 | 0.000338 | 0.067391 | 21.20 |
|     | RAC875_c14078_202           | 5B | 620.71 | 0.000341 | 0.078612 | 20.90 |
|     | Ra_c33766_656               | 3B | 553.79 | 0.000351 | 0.089833 | 20.60 |
|     | Excalibur_s113695_111       | 6B | 237.57 | 0.000356 | 0.011287 | 20.30 |
|     | wsnp_Ku_c792_1635317        | 7A | 123.58 | 0.000386 | 0.011287 | 20.00 |
|     | Kukri_c55051_414            | 5A | 68.2   | 0.000399 | 0.011287 | 19.70 |
|     | BS00064602_51               | 1B | 246.08 | 0.000433 | 0.011287 | 19.40 |



|                          |    |        |          |          |       |
|--------------------------|----|--------|----------|----------|-------|
| RAC875_rep_c104914_222   | 5B | 119.59 | 0.000488 | 0.011287 | 19.10 |
| Tdurum_contig81797_369   | 4B | 173.63 | 0.000554 | 0.011287 | 18.80 |
| BS00023431_51            | 4B | 173.63 | 0.000554 | 0.022508 | 18.50 |
| wsnp_Ex_c8913_14881924   | 4B | 173.63 | 0.000554 | 0.022508 | 18.20 |
| BobWhite_c44691_648      | 4B | 173.63 | 0.000554 | 0.026592 | 17.90 |
| Kukri_c27495_816         | 1B | 206.01 | 0.000589 | 0.00671  | 17.60 |
| Tdurum_contig94033_487   | 5B | 401.49 | 0.000644 | 0.00671  | 17.30 |
| Tdurum_contig11399_221   | 5B | 401.49 | 0.000644 | 0.00671  | 17.00 |
| BS00009791_51            | 2B | 431.19 | 0.000717 | 0.00671  | 16.70 |
| BS00010134_51            | 7B | 458.56 | 0.000721 | 0.00671  | 16.40 |
| Kukri_c28230_267         | 7A | 371.96 | 0.000758 | 0.00671  | 16.10 |
| BS00076298_51            | 3D | 1      | 0.000764 | 0.00671  | 15.80 |
| Excalibur_c76695_71      | 3B | 578.89 | 0.000768 | 0.00671  | 15.50 |
| Excalibur_rep_c71254_415 | 5A | 423.48 | 0.00085  | 0.00671  | 15.20 |
| Excalibur_c17237_688     | 2D | 222.41 | 0.000868 | 0.00671  | 14.90 |
| wsnp_Ex_c410_808465      | 7D | 50.6   | 0.000929 | 0.00671  | 14.60 |

This table provides the SNP id, chromosome, position in cM, P-value, R% is R<sup>2</sup> of the model with the SNP (phenotypic variation), and adjusted P-values following false discovery rate (FDR) under **water shortage** conditions, flag leaf area (FLA), stomata Size (SS), stomata Frequency (SF), leaf Venation (LEV), number of grain per spike (GPS) and grain yield per plant (GYP)

**Table S3.** GWAS Results under water shortage conditions.

|     | SNP                     | Chromosome | Position | P.value  | FDR       | R%    |
|-----|-------------------------|------------|----------|----------|-----------|-------|
| FLA | BS00038787_51           | 7A         | 369.49   | 2.78E-05 | 0.020394  | 23.40 |
|     | Ra_c58279_684           | 2A         | 261.05   | 3.06E-05 | 0.020394  | 22.90 |
|     | wsnp_Ex_c5412_9564046   | 2A         | 261.05   | 3.72E-05 | 0.020394  | 22.40 |
|     | GENE-4367_562           | 4A         | 575.49   | 5.33E-05 | 0.020394  | 21.90 |
|     | BobWhite_c41815_145     | 7A         | 371.18   | 0.000155 | 0.020394  | 21.40 |
|     | wsnp_Ex_c24167_33416760 | 7A         | 148.26   | 0.000189 | 0.020394  | 20.90 |
|     | Excalibur_c35339_106    | 4B         | 220.48   | 0.000195 | 0.020394  | 20.40 |
|     | Tdurum_contig10598_304  | 6B         | 229.64   | 0.000237 | 0.020394  | 19.90 |
|     | wsnp_Ex_c5412_9564478   | 2A         | 257.26   | 0.000261 | 0.020394  | 19.40 |
|     | wsnp_Ku_c10292_17066821 | 1A         | 261.32   | 0.000301 | 0.020394  | 18.90 |
|     | Excalibur_c17237_688    | 2D         | 222.41   | 0.000303 | 0.020394  | 18.40 |
|     | Tdurum_contig46583_2203 | 4A         | 575.49   | 0.000315 | 0.020394  | 17.90 |
|     | CAP8_c6370_254          | 6B         | 245.09   | 0.000341 | 0.020394  | 17.40 |
|     | wsnp_Ex_c3854_7003482   | 6B         | 245.09   | 0.00039  | 0.020394  | 16.90 |
|     | Tdurum_contig62155_325  | 6B         | 245.09   | 0.000393 | 0.020394  | 16.40 |
|     | BS00026471_51           | 3B         | 23.14    | 0.000394 | 0.020394  | 15.90 |
|     | Tdurum_contig81797_369  | 4B         | 173.63   | 0.000398 | 0.020394  | 15.40 |
|     | BS00023431_51           | 4B         | 173.63   | 0.000398 | 0.020394  | 14.90 |
|     | wsnp_Ex_c8913_14881924  | 4B         | 173.63   | 0.000398 | 0.020394  | 14.40 |
|     | BobWhite_c44691_648     | 4B         | 173.63   | 0.000398 | 0.0152734 | 13.90 |
|     | wsnp_Ex_c5412_9564550   | 2A         | 261.05   | 0.000401 | 0.0152734 | 13.40 |
|     | tplb0025h02_1383        | 6D         | 293.15   | 0.000419 | 0.0152734 | 12.90 |
|     | wsnp_Ra_c3176_5975986   | 7B         | 246.93   | 0.00046  | 0.0152734 | 12.40 |
|     | wsnp_Ex_c5412_9564346   | 2A         | 257.26   | 0.000482 | 0.0152734 | 11.90 |
|     | BS00109911_51           | 4A         | 603.44   | 0.000484 | 0.0152734 | 11.90 |
|     | BobWhite_c26570_282     | 2A         | 410.9    | 0.000497 | 0.0152734 | 11.90 |
|     | Excalibur_c24613_302    | 6B         | 408.89   | 0.000549 | 0.0152734 | 11.90 |
|     | Excalibur_c26971_1730   | 4A         | 598.31   | 0.000553 | 0.0152734 | 11.90 |
|     | Excalibur_c34115_271    | 7A         | 103.7    | 0.000558 | 0.0152734 | 11.90 |
|     | BS00010134_51           | 7B         | 458.56   | 0.000569 | 0.0152734 | 11.90 |
|     | Tdurum_contig62445_667  | 7A         | 98.21    | 0.000621 | 0.0152734 | 11.90 |
|     | wsnp_Ex_c5936_10411877  | 6B         | 245.09   | 0.000652 | 0.0152734 | 11.90 |
|     | IACX5724                | 4A         | 589.42   | 0.000746 | 0.0152734 | 11.90 |
|     | Excalibur_c1251_2031    | 2B         | 319.82   | 0.000783 | 0.0152734 | 11.90 |
|     | wsnp_Ku_c792_1635317    | 7A         | 123.58   | 0.000802 | 0.0152734 | 11.90 |
|     | RAC875_s117925_244      | 5A         | 77.77    | 0.000806 | 0.0152734 | 11.90 |
|     | RAC875_c5986_3670       | 6B         | 245.09   | 0.000814 | 0.0152734 | 11.90 |
|     | Excalibur_c98849_278    | 6B         | 245.09   | 0.000822 | 0.0152734 | 11.90 |
|     | RFL_Contig1015_580      | 6B         | 245.8    | 0.000822 | 0.0152734 | 11.90 |

|    |                             |    |        |          |           |       |
|----|-----------------------------|----|--------|----------|-----------|-------|
|    | Tdurum_contig81414_256      | 6B | 246.18 | 0.000822 | 0.0152734 | 11.90 |
|    | wsnp_Ku_c15761_24469459     | 6B | 245.09 | 0.000838 | 0.0152734 | 11.90 |
|    | Excalibur_c76695_71         | 3B | 578.89 | 0.000851 | 0.0152734 | 10.40 |
|    | wsnp_Ex_rep_c66315_64480670 | 6B | 245.09 | 0.000852 | 0.0152734 | 10.40 |
|    | Jagger_c342_119             | 3B | 42.1   | 0.000858 | 0.0152734 | 10.40 |
|    | TA006249-0396               | 6B | 245.09 | 0.00086  | 0.0152734 | 10.40 |
|    | wsnp_Ex_c24766_34017588     | 6B | 245.09 | 0.00086  | 0.0152734 | 10.40 |
|    | wsnp_Ex_rep_c66315_64480362 | 6B | 245.09 | 0.00086  | 0.0152734 | 10.40 |
|    | wsnp_Ra_c35443_43984178     | 6B | 245.09 | 0.00086  | 0.0152734 | 10.40 |
|    | wsnp_RFL_Contig2699_2402527 | 3A | 321.73 | 0.000864 | 0.0152734 | 10.40 |
|    | wsnp_Ku_c4834_8676678       | 6B | 245.09 | 0.000979 | 0.0152734 | 10.40 |
| SS | Excalibur_c35339_106        | 4B | 220.48 | 8.91E-05 | 0.0225076 | 21.09 |
|    | BS00038787_51               | 7A | 369.49 | 9.80E-05 | 0.026592  | 20.57 |
|    | Tdurum_contig10598_304      | 6B | 229.64 | 0.000109 | 0.0067095 | 20.19 |
|    | wsnp_Ex_c24167_33416760     | 7A | 148.26 | 0.000169 | 0.0067095 | 19.71 |
|    | BobWhite_c23828_341         | 6B | 150.07 | 0.000182 | 0.0067095 | 19.26 |
|    | IAAV4269                    | 5B | 126.02 | 0.000198 | 0.0067095 | 18.81 |
|    | BS00064602_51               | 1B | 246.08 | 0.000342 | 0.0067095 | 18.36 |
|    | Excalibur_c76695_71         | 3B | 578.89 | 0.000361 | 0.0067095 | 17.91 |
|    | BS00009791_51               | 2B | 431.19 | 0.000374 | 0.0196389 | 17.46 |
|    | Excalibur_rep_c71254_415    | 5A | 423.48 | 0.000405 | 0.0208676 | 17.01 |
|    | IAAV8743                    | 1A | 311.34 | 0.000471 | 0.0208676 | 16.56 |
|    | wsnp_Ra_c3176_5975986       | 7B | 246.93 | 0.000618 | 0.0238768 | 16.11 |
|    | Excalibur_s113695_111       | 6B | 237.57 | 0.00062  | 0.0238768 | 15.66 |
|    | GENE-4367_562               | 4A | 575.49 | 0.000622 | 0.0252037 | 15.21 |
|    | Excalibur_c17237_688        | 2D | 222.41 | 0.000687 | 0.0252037 | 14.76 |
|    | BS00065784_51               | 1A | 291.13 | 0.000703 | 0.0238352 | 14.31 |
|    | BS00076298_51               | 3D | 1      | 0.00071  | 0.0224667 | 13.86 |
|    | BS00105833_51               | 1B | 142.58 | 0.000721 | 0.0210982 | 13.41 |
|    | IACX5724                    | 4A | 589.42 | 0.000739 | 0.0197297 | 12.96 |
|    | Ra_c33766_656               | 3B | 553.79 | 0.000747 | 0.0183612 | 12.51 |
|    | CAP8_c6370_254              | 6B | 245.09 | 0.000857 | 0.0169927 | 12.06 |
|    | BobWhite_rep_c62840_612     | 4A | 259.21 | 0.000883 | 0.0156242 | 11.61 |
|    | Tdurum_contig29522_232      | 7B | 232.89 | 0.000887 | 0.0142557 | 11.16 |
|    | wsnp_Ex_c3854_7003482       | 6B | 245.09 | 0.000922 | 0.0128872 | 10.71 |
|    | Kukri_c55051_414            | 5A | 68.2   | 0.000938 | 0.0115187 | 10.26 |
|    | RAC875_c57353_245           | 2B | 431.19 | 0.000958 | 0.0101502 | 9.81  |
|    | Ra_c58279_684               | 2A | 261.05 | 0.00099  | 0.0087817 | 9.36  |
|    | wsnp_Ex_c8913_14881924      | 4B | 173.63 | 0.00101  | 0.0074132 | 8.91  |
|    | BobWhite_c44691_648         | 4B | 173.63 | 0.00101  | 0.0060447 | 8.46  |
| SF | BS00038787_51               | 7A | 369.49 | 2.96E-05 | 0.0067095 | 24.08 |

|    |                             |    |        |          |           |       |
|----|-----------------------------|----|--------|----------|-----------|-------|
|    | Ra_c58279_684               | 2A | 261.05 | 4.45E-05 | 0.0196389 | 23.50 |
|    | wsnp_Ex_c5412_9564046       | 2A | 261.05 | 5.37E-05 | 0.0325683 | 22.20 |
|    | GENE-4367_562               | 4A | 575.49 | 9.31E-05 | 0.0454977 | 21.38 |
|    | Excalibur_c35339_106        | 4B | 220.48 | 0.000145 | 0.0584271 | 20.43 |
|    | Tdurum_contig10598_304      | 6B | 229.64 | 0.000167 | 0.0713565 | 19.49 |
|    | wsnp_Ex_c24167_33416760     | 7A | 148.26 | 0.000175 | 0.0842859 | 18.55 |
|    | Excalibur_c17237_688        | 2D | 222.41 | 0.000186 | 0.0972153 | 17.61 |
|    | BobWhite_c41815_145         | 7A | 371.18 | 0.000247 | 0.1101447 | 16.66 |
|    | wsnp_Ex_c5412_9564478       | 2A | 257.26 | 0.000259 | 0.1230741 | 15.72 |
|    | BS00010134_51               | 7B | 458.56 | 0.000306 | 0.1360035 | 14.78 |
|    | CAP8_c6370_254              | 6B | 245.09 | 0.000433 | 0.1489329 | 13.84 |
|    | tplb0025h02_1383            | 6D | 293.15 | 0.000465 | 0.1618623 | 12.89 |
|    | BS00026471_51               | 3B | 23.14  | 0.000493 | 0.1747917 | 11.95 |
|    | wsnp_Ex_c3854_7003482       | 6B | 245.09 | 0.000493 | 0.1877211 | 11.01 |
|    | Tdurum_contig62155_325      | 6B | 245.09 | 0.000503 | 0.0429996 | 10.07 |
|    | Tdurum_contig46583_2203     | 4A | 575.49 | 0.000514 | 0.0364488 | 9.12  |
|    | wsnp_Ra_c3176_5975986       | 7B | 246.93 | 0.000523 | 0.0368977 | 8.18  |
|    | Excalibur_c76695_71         | 3B | 578.89 | 0.000535 | 0.0386242 | 8.18  |
|    | wsnp_Ex_c5412_9564550       | 2A | 261.05 | 0.000566 | 0.0386242 | 8.18  |
|    | wsnp_Ex_c8913_14881924      | 4B | 173.63 | 0.000592 | 0.0386242 | 8.18  |
|    | BobWhite_c44691_648         | 4B | 173.63 | 0.000592 | 0.0117506 | 8.18  |
|    | Tdurum_contig81797_369      | 4B | 173.63 | 0.000592 | 0.0117506 | 8.18  |
|    | BS00023431_51               | 4B | 173.63 | 0.000592 | 0.0117506 | 8.18  |
|    | Excalibur_c34115_271        | 7A | 103.7  | 0.000618 | 0.0117506 | 8.18  |
|    | RAC875_s117925_244          | 5A | 77.77  | 0.000651 | 0.0117506 | 8.18  |
|    | wsnp_Ku_c10292_17066821     | 1A | 261.32 | 0.000679 | 0.0117506 | 8.18  |
|    | wsnp_Ex_c5412_9564346       | 2A | 257.26 | 0.000683 | 0.0117506 | 8.18  |
|    | Tdurum_contig62445_667      | 7A | 98.21  | 0.000685 | 0.0117506 | 8.18  |
|    | wsnp_Ku_c792_1635317        | 7A | 123.58 | 0.000691 | 0.0117506 | 8.18  |
|    | Excalibur_rep_c71254_415    | 5A | 423.48 | 0.000705 | 0.0117506 | 8.18  |
|    | Excalibur_c24613_302        | 6B | 408.89 | 0.00074  | 0.0117506 | 8.18  |
|    | BS00067526_51               | 1B | 344.72 | 0.000764 | 0.0117506 | 8.18  |
|    | Excalibur_c1251_2031        | 2B | 319.82 | 0.000788 | 0.0117506 | 8.18  |
|    | Excalibur_c26971_1730       | 4A | 598.31 | 0.00082  | 0.0117506 | 8.18  |
|    | wsnp_Ex_c5936_10411877      | 6B | 245.09 | 0.000847 | 0.0117506 | 8.18  |
|    | wsnp_RFL_Contig2699_2402527 | 3A | 321.73 | 0.000859 | 0.0117506 | 8.18  |
|    | Tdurum_contig29522_232      | 7B | 232.89 | 0.000874 | 0.0117506 | 8.18  |
|    | IACX5724                    | 4A | 589.42 | 0.00089  | 0.0117506 | 8.18  |
|    | BS00109911_51               | 4A | 603.44 | 0.000915 | 0.0117506 | 8.18  |
|    | RAC875_rep_c104914_222      | 5B | 119.59 | 0.000965 | 0.0117506 | 8.18  |
| LV | BS00038787_51               | 7A | 369.49 | 6.44E-05 | 0.0429996 | 28.10 |

|     |                          |    |        |          |           |       |
|-----|--------------------------|----|--------|----------|-----------|-------|
|     | Excalibur_c35339_106     | 4B | 220.48 | 0.000107 | 0.0364488 | 27.97 |
|     | wsnp_Ex_c24167_33416760  | 7A | 148.26 | 0.000125 | 0.0364488 | 27.59 |
|     | Tdurum_contig10598_304   | 6B | 229.64 | 0.000131 | 0.0364488 | 27.38 |
|     | IAAV4269                 | 5B | 126.02 | 0.000238 | 0.0364488 | 27.12 |
|     | BobWhite_c23828_341      | 6B | 150.07 | 0.000257 | 0.0364488 | 26.87 |
|     | Excalibur_rep_c71254_415 | 5A | 423.48 | 0.000339 | 0.0364488 | 26.61 |
|     | Excalibur_c76695_71      | 3B | 578.89 | 0.000348 | 0.0364488 | 26.36 |
|     | GENE-4367_562            | 4A | 575.49 | 0.000379 | 0.0364488 | 26.10 |
|     | Ra_c33766_656            | 3B | 553.79 | 0.00043  | 0.0364488 | 25.85 |
|     | Excalibur_c17237_688     | 2D | 222.41 | 0.00044  | 0.0364488 | 25.60 |
|     | Kukri_c55051_414         | 5A | 68.2   | 0.000495 | 0.0364488 | 25.34 |
|     | BS00064602_51            | 1B | 246.08 | 0.000498 | 0.0364488 | 25.09 |
|     | wsnp_Ra_c3176_5975986    | 7B | 246.93 | 0.000503 | 0.0364488 | 24.83 |
|     | Excalibur_s113695_111    | 6B | 237.57 | 0.000537 | 0.0364488 | 24.58 |
|     | BS00009791_51            | 2B | 431.19 | 0.000557 | 0.0364488 | 24.32 |
|     | IAAV8743                 | 1A | 311.34 | 0.000622 | 0.0364488 | 24.07 |
|     | Ra_c58279_684            | 2A | 261.05 | 0.000654 | 0.0364488 | 23.82 |
|     | RAC875_rep_c104914_222   | 5B | 119.59 | 0.000671 | 0.0364488 | 23.56 |
|     | Kukri_c22011_1447        | 1A | 481.08 | 0.000699 | 0.0364488 | 23.31 |
|     | Tdurum_contig29522_232   | 7B | 232.89 | 0.000742 | 0.0364488 | 23.05 |
|     | wsnp_Ex_c5412_9564046    | 2A | 261.05 | 0.000765 | 0.0364488 | 22.80 |
|     | RAC875_c14078_202        | 5B | 620.71 | 0.000794 | 0.0364488 | 22.54 |
|     | IACX5724                 | 4A | 589.42 | 0.000799 | 0.0364488 | 22.29 |
|     | BobWhite_rep_c62840_612  | 4A | 259.21 | 0.000806 | 0.0364488 | 22.04 |
|     | Tdurum_contig94033_487   | 5B | 401.49 | 0.00081  | 0.0364488 | 21.78 |
|     | Tdurum_contig11399_221   | 5B | 401.49 | 0.00081  | 0.0364488 | 21.53 |
|     | BS00076298_51            | 3D | 1      | 0.000826 | 0.0364488 | 21.27 |
|     | CAP8_c6370_254           | 6B | 245.09 | 0.000846 | 0.0364488 | 21.02 |
|     | BS00067526_51            | 1B | 344.72 | 0.000879 | 0.0364488 | 20.76 |
|     | BS00105833_51            | 1B | 142.58 | 0.000907 | 0.0364488 | 20.51 |
|     | wsnp_Ex_c3854_7003482    | 6B | 245.09 | 0.000928 | 0.0364488 | 20.25 |
|     | Tdurum_contig62155_325   | 6B | 245.09 | 0.000974 | 0.0364488 | 20.00 |
|     | wsnp_Ex_c8913_14881924   | 4B | 173.63 | 0.00098  | 0.0364488 | 19.75 |
|     | BobWhite_c44691_648      | 4B | 173.63 | 0.00098  | 0.0364488 | 19.49 |
|     | Tdurum_contig81797_369   | 4B | 173.63 | 0.00098  | 0.0364488 | 19.24 |
|     | BS00023431_51            | 4B | 173.63 | 0.00098  | 0.0364488 | 18.98 |
| NGS | BS00038787_51            | 7A | 369.49 | 2.79E-05 | 0.0364488 | 22.11 |
|     | Ra_c58279_684            | 2A | 261.05 | 3.08E-05 | 0.0364488 | 22.08 |
|     | wsnp_Ex_c5412_9564046    | 2A | 261.05 | 3.75E-05 | 0.0364488 | 20.64 |
|     | GENE-4367_562            | 4A | 575.49 | 5.36E-05 | 0.0364488 | 20.15 |
|     | BobWhite_c41815_145      | 7A | 371.18 | 0.000155 | 0.0364488 | 19.41 |

|                             |    |        |          |           |       |
|-----------------------------|----|--------|----------|-----------|-------|
| wsnp_Ex_c24167_33416760     | 7A | 148.26 | 0.00019  | 0.0364488 | 18.68 |
| Excalibur_c35339_106        | 4B | 220.48 | 0.000196 | 0.0364488 | 17.95 |
| Tdurum_contig10598_304      | 6B | 229.64 | 0.000237 | 0.0364488 | 17.21 |
| wsnp_Ex_c5412_9564478       | 2A | 257.26 | 0.000263 | 0.0364488 | 16.48 |
| wsnp_Ku_c10292_17066821     | 1A | 261.32 | 0.000302 | 0.0364488 | 15.75 |
| Excalibur_c17237_688        | 2D | 222.41 | 0.000307 | 0.0364488 | 15.01 |
| Tdurum_contig46583_2203     | 4A | 575.49 | 0.000317 | 0.0364488 | 14.28 |
| CAP8_c6370_254              | 6B | 245.09 | 0.000342 | 0.0364488 | 13.55 |
| wsnp_Ex_c3854_7003482       | 6B | 245.09 | 0.000391 | 0.0364488 | 12.81 |
| Tdurum_contig62155_325      | 6B | 245.09 | 0.000395 | 0.0364488 | 12.08 |
| wsnp_Ex_c8913_14881924      | 4B | 173.63 | 0.000395 | 0.0364488 | 11.35 |
| BobWhite_c44691_648         | 4B | 173.63 | 0.000395 | 0.0364488 | 10.61 |
| Tdurum_contig81797_369      | 4B | 173.63 | 0.000395 | 0.0364488 | 9.88  |
| BS00023431_51               | 4B | 173.63 | 0.000395 | 0.0364488 | 9.15  |
| BS00026471_51               | 3B | 23.14  | 0.000396 | 0.0364488 | 8.41  |
| wsnp_Ex_c5412_9564550       | 2A | 261.05 | 0.000403 | 0.0364488 | 7.68  |
| tplb0025h02_1383            | 6D | 293.15 | 0.000422 | 0.0364488 | 6.95  |
| wsnp_Ra_c3176_5975986       | 7B | 246.93 | 0.000467 | 0.0364488 | 6.95  |
| wsnp_Ex_c5412_9564346       | 2A | 257.26 | 0.000483 | 0.0364488 | 6.95  |
| BS00109911_51               | 4A | 603.44 | 0.000483 | 0.0364488 | 6.95  |
| BobWhite_c26570_282         | 2A | 410.9  | 0.000497 | 0.0364488 | 6.95  |
| Excalibur_c24613_302        | 6B | 408.89 | 0.000549 | 0.0364488 | 6.95  |
| Excalibur_c26971_1730       | 4A | 598.31 | 0.000555 | 0.0364488 | 6.95  |
| Excalibur_c34115_271        | 7A | 103.7  | 0.000561 | 0.0364488 | 6.95  |
| BS00010134_51               | 7B | 458.56 | 0.000568 | 0.0364488 | 6.95  |
| Tdurum_contig62445_667      | 7A | 98.21  | 0.000625 | 0.0364488 | 6.95  |
| wsnp_Ex_c5936_10411877      | 6B | 245.09 | 0.000655 | 0.0364488 | 6.95  |
| IACX5724                    | 4A | 589.42 | 0.000747 | 0.0364488 | 6.95  |
| Excalibur_c1251_2031        | 2B | 319.82 | 0.000778 | 0.0364488 | 6.95  |
| wsnp_Ku_c792_1635317        | 7A | 123.58 | 0.000796 | 0.0364488 | 6.95  |
| RAC875_s117925_244          | 5A | 77.77  | 0.000811 | 0.0364488 | 6.95  |
| RAC875_c5986_3670           | 6B | 245.09 | 0.000818 | 0.0364488 | 6.95  |
| Excalibur_c98849_278        | 6B | 245.09 | 0.000826 | 0.0364488 | 6.95  |
| RFL_Contig1015_580          | 6B | 245.8  | 0.000826 | 0.0364488 | 6.95  |
| Tdurum_contig81414_256      | 6B | 246.18 | 0.000826 | 0.0364488 | 6.95  |
| wsnp_Ku_c15761_24469459     | 6B | 245.09 | 0.000842 | 0.0364488 | 6.95  |
| Excalibur_c76695_71         | 3B | 578.89 | 0.00085  | 0.0364488 | 6.95  |
| wsnp_Ex_rep_c66315_64480670 | 6B | 245.09 | 0.000855 | 0.0364488 | 6.95  |
| Jagger_c342_119             | 3B | 42.1   | 0.000862 | 0.0364488 | 6.95  |
| wsnp_Ex_rep_c66315_64480362 | 6B | 245.09 | 0.000865 | 0.0364488 | 6.95  |
| wsnp_Ra_c35443_43984178     | 6B | 245.09 | 0.000865 | 0.0364488 | 6.95  |

|     |                             |    |        |          |           |       |
|-----|-----------------------------|----|--------|----------|-----------|-------|
|     | TA006249-0396               | 6B | 245.09 | 0.000865 | 0.0364488 | 6.95  |
|     | wsnp_Ex_c24766_34017588     | 6B | 245.09 | 0.000865 | 0.0364488 | 6.95  |
|     | wsnp_RFL_Contig2699_2402527 | 3A | 321.73 | 0.000871 | 0.0364488 | 6.95  |
|     | wsnp_Ku_c4834_8676678       | 6B | 245.09 | 0.000984 | 0.0364488 | 6.95  |
| GYP | BS00038787_51               | 7A | 369.49 | 6.55E-05 | 0.0187155 | 23.46 |
|     | Excalibur_c35339_106        | 4B | 220.48 | 0.000109 | 0.0187155 | 23.06 |
|     | Tdurum_contig10598_304      | 6B | 229.64 | 0.000122 | 0.020394  | 22.98 |
|     | wsnp_Ex_c24167_33416760     | 7A | 148.26 | 0.000124 | 0.020394  | 22.69 |
|     | IAAV4269                    | 5B | 126.02 | 0.000235 | 0.020394  | 22.45 |
|     | BobWhite_c23828_341         | 6B | 150.07 | 0.000259 | 0.020394  | 22.21 |
|     | Excalibur_rep_c71254_415    | 5A | 423.48 | 0.000342 | 0.020394  | 21.97 |
|     | GENE-4367_562               | 4A | 575.49 | 0.000363 | 0.020394  | 21.73 |
|     | Excalibur_c76695_71         | 3B | 578.89 | 0.000369 | 0.020394  | 21.49 |
|     | Ra_c33766_656               | 3B | 553.79 | 0.000426 | 0.020394  | 21.25 |
|     | Excalibur_c17237_688        | 2D | 222.41 | 0.000473 | 0.0152734 | 21.01 |
|     | Kukri_c55051_414            | 5A | 68.2   | 0.000488 | 0.0190507 | 20.77 |
|     | wsnp_Ra_c3176_5975986       | 7B | 246.93 | 0.000512 | 0.0189553 | 20.53 |
|     | BS00009791_51               | 2B | 431.19 | 0.000543 | 0.0188599 | 20.29 |
|     | BS00064602_51               | 1B | 246.08 | 0.000546 | 0.0187645 | 20.05 |
|     | Excalibur_s113695_111       | 6B | 237.57 | 0.000556 | 0.0186691 | 19.81 |
|     | IAAV8743                    | 1A | 311.34 | 0.000586 | 0.0185736 | 19.57 |
|     | RAC875_rep_c104914_222      | 5B | 119.59 | 0.000668 | 0.0184782 | 19.33 |
|     | Ra_c58279_684               | 2A | 261.05 | 0.00067  | 0.0183828 | 19.09 |
|     | Kukri_c22011_1447           | 1A | 481.08 | 0.000713 | 0.0182874 | 18.85 |
|     | Tdurum_contig29522_232      | 7B | 232.89 | 0.000753 | 0.018192  | 18.61 |
|     | wsnp_Ex_c5412_9564046       | 2A | 261.05 | 0.000781 | 0.0180965 | 18.37 |
|     | Tdurum_contig94033_487      | 5B | 401.49 | 0.000795 | 0.0180011 | 18.13 |
|     | Tdurum_contig11399_221      | 5B | 401.49 | 0.000795 | 0.0179057 | 17.89 |
|     | RAC875_c14078_202           | 5B | 620.71 | 0.000799 | 0.0178103 | 17.65 |
|     | CAP8_c6370_254              | 6B | 245.09 | 0.0008   | 0.0177148 | 17.41 |
|     | IACX5724                    | 4A | 589.42 | 0.000811 | 0.0176194 | 17.17 |
|     | BS00076298_51               | 3D | 1      | 0.000835 | 0.017524  | 16.93 |
|     | BobWhite_rep_c62840_612     | 4A | 259.21 | 0.000841 | 0.0174286 | 16.69 |
|     | wsnp_Ex_c3854_7003482       | 6B | 245.09 | 0.000877 | 0.0173332 | 16.45 |
|     | BS00067526_51               | 1B | 344.72 | 0.000899 | 0.0172377 | 16.21 |
|     | Tdurum_contig62155_325      | 6B | 245.09 | 0.000918 | 0.0171423 | 15.97 |
|     | BS00105833_51               | 1B | 142.58 | 0.000937 | 0.0170469 | 15.73 |
|     | Tdurum_contig81797_369      | 4B | 173.63 | 0.000961 | 0.0169515 | 15.49 |
|     | BS00023431_51               | 4B | 173.63 | 0.000961 | 0.0168561 | 15.25 |
|     | wsnp_Ex_c8913_14881924      | 4B | 173.63 | 0.000961 | 0.0167606 | 15.02 |
|     | BobWhite_c44691_648         | 4B | 173.63 | 0.000961 | 0.0166652 | 14.78 |

This table provides the SNP id, chromosome, position in cM, P-value, R<sup>2</sup> is R<sup>2</sup> of the model with the SNP (phenotypic variation), and adjusted P-values following false discovery rate (FDR) under drought conditions, flag leaf area (FLA), stomata Size (SS), stomata Frequency (SF), leaf Venation (LEV), number of grain per spike (GPS) and grain yield per plant (GYP)



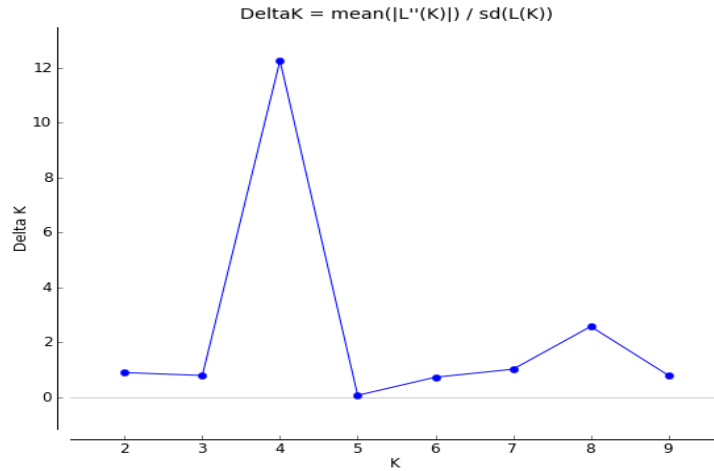

**Figure S1.** The result obtained of 96 spring wheat genotypes using studied SNPs from Structure Harvester analysis. It's based on the second order derivation on the variance of the maximum likelihood estimation of your model given a specific K. Delta K shows only the uppermost clustering level and number of subpopulations in main population.

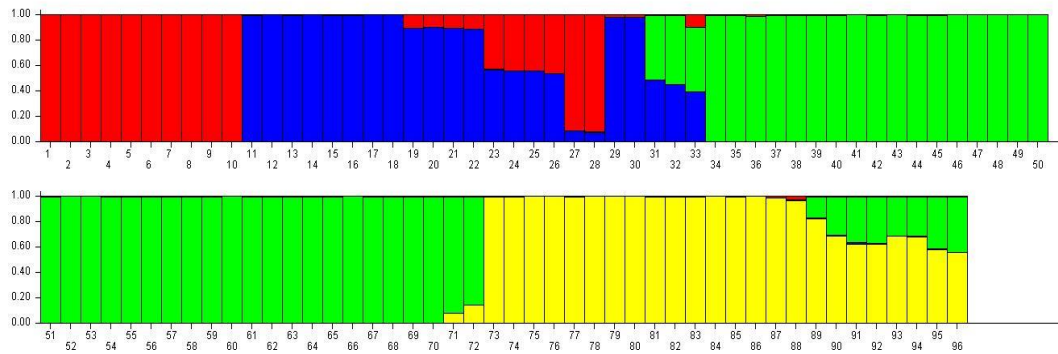

**Figure S2.** Population structure of 96 bread wheat accessions based on Bayesian methodology using 90K SNPS markers detecting four clusters, K=4. The dissimilar colors demonstrating the diverse clusters which having the studied genotypes corresponding to Table S1.

**Figure S3-S14 Quantile-quantile (QQ) –plot of  $P$ -values**

Quantile-quantile (QQ) –plot of  $P$ -values. The Y-axis is the observed negative base 10 logarithm of the  $P$ -values, and the X-axis is the expected observed negative base 10 logarithm of the  $P$ -values under the assumption that the  $P$ -values follow a uniform  $[0,1]$  distribution. The dotted lines show the 95% confidence interval for the QQ-plot under the null hypothesis of no association between the SNP and the trait.

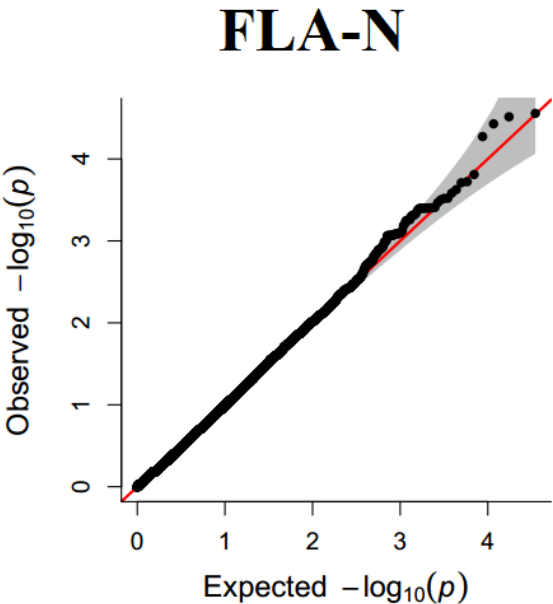

Figure S3

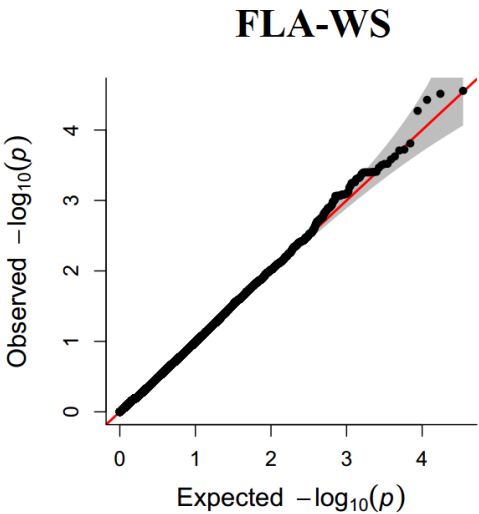

Figure S4

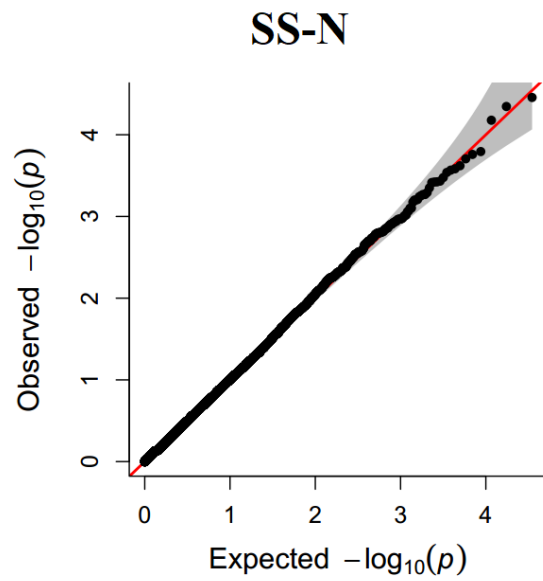

Figure S5

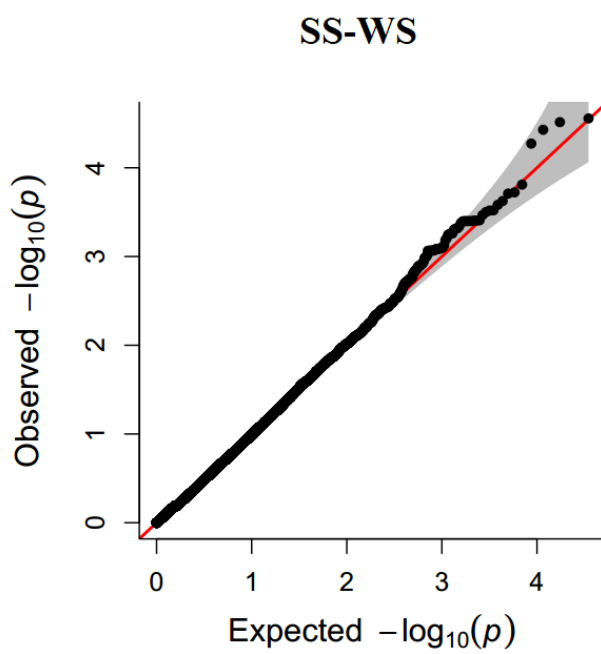

Figure S6

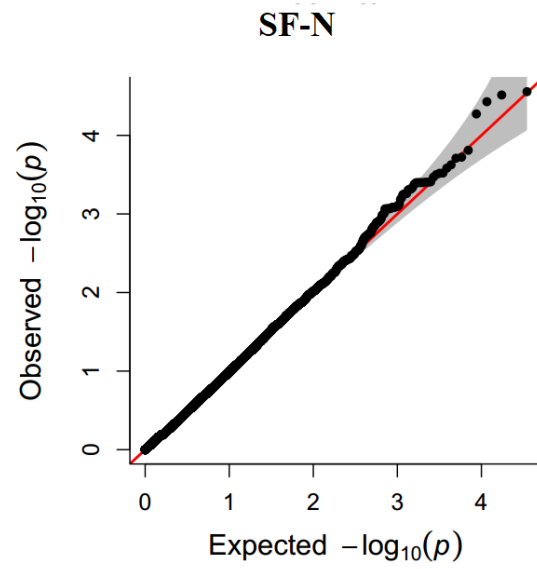

Figure S7

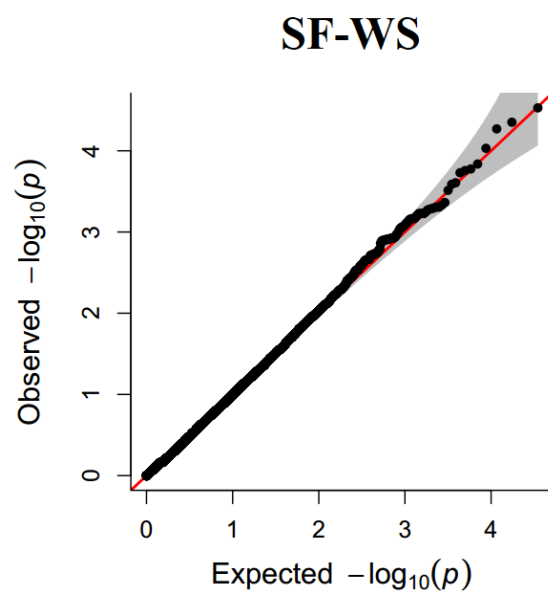

Figure S8

## LV-N

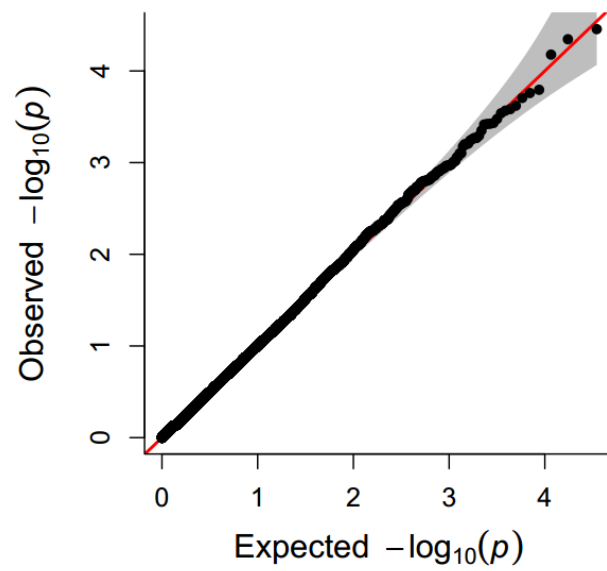

Figure S9

## LV-WS

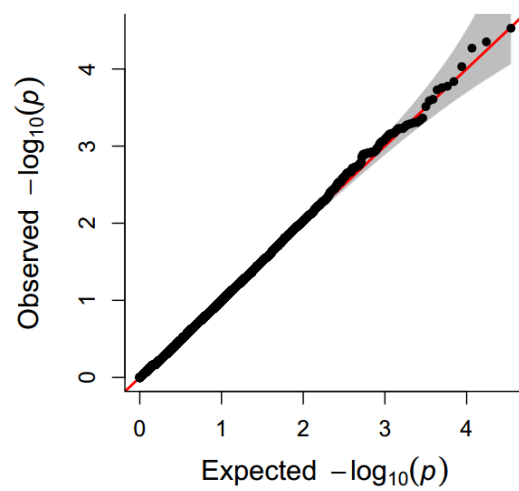

Figure S10

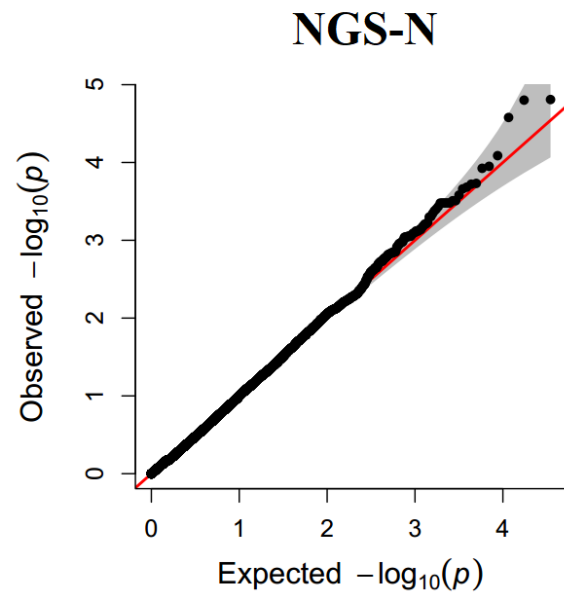

Figure S11

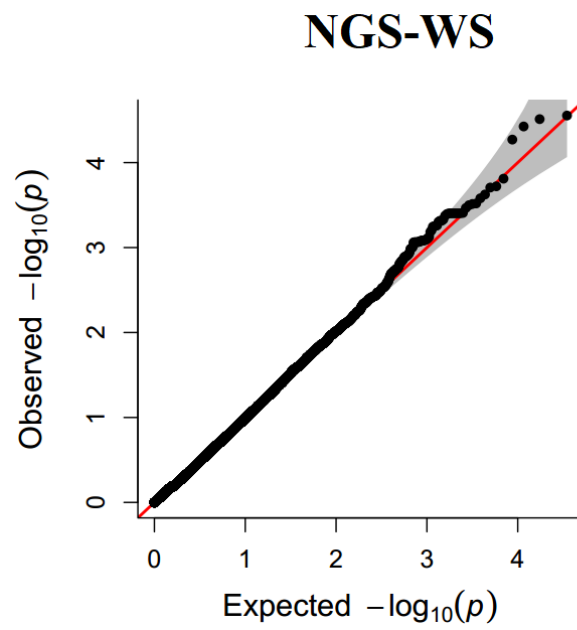

Figure 12

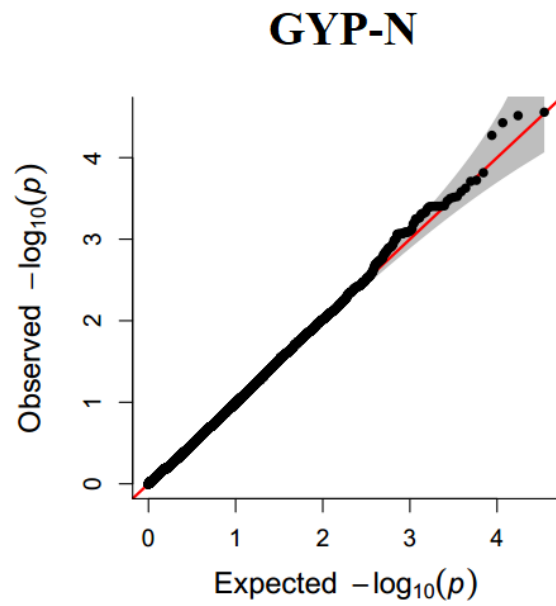

Figure S13

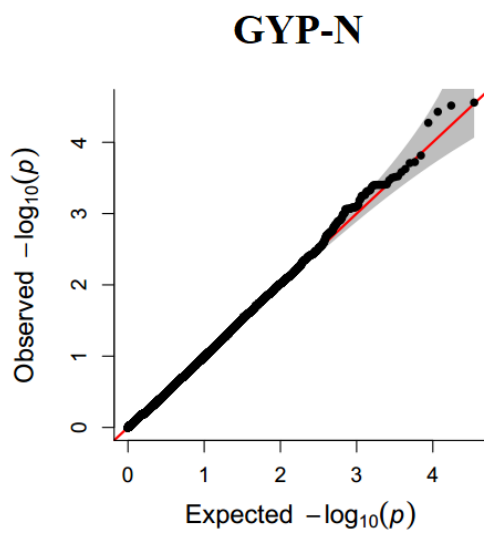

Figure S14
